# Supplementary material
Source: PubMed Central journal article supplement (PMC8662706)

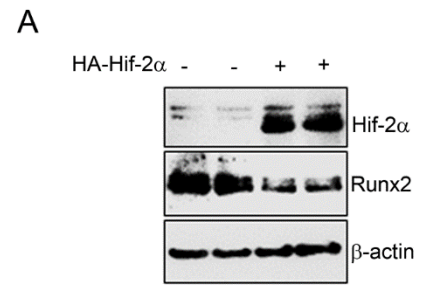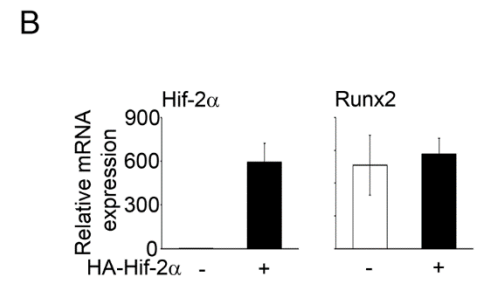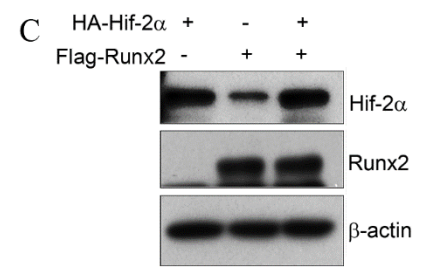

Supplement: NIHMS1757265-supplement-Supp_Fig_1.pdf [file NIHMS1757265-supplement-Supp_Fig_1.pdf]

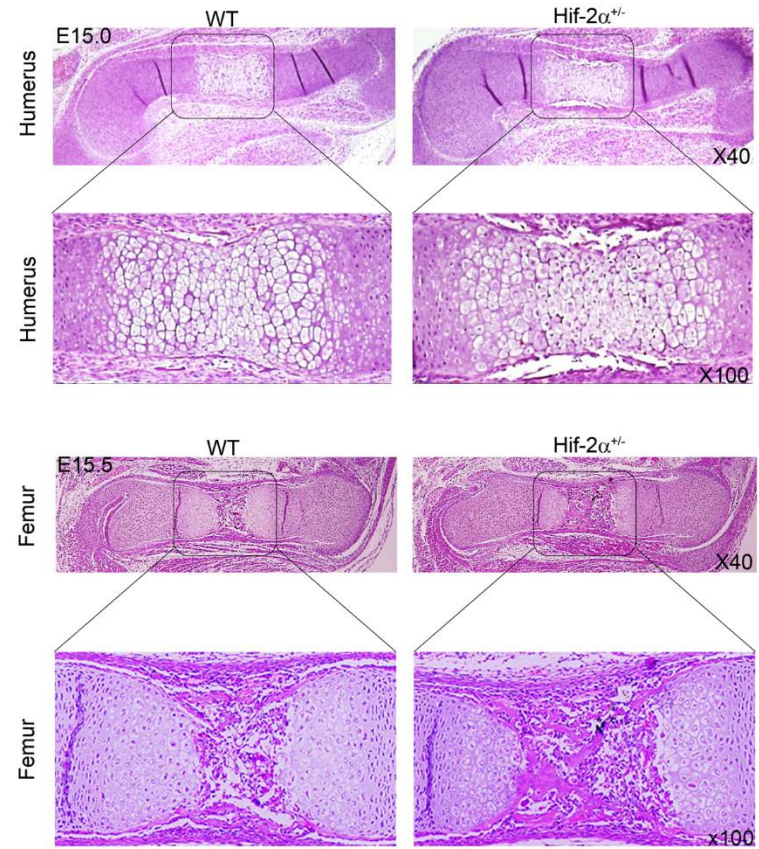

Supplement: NIHMS1757265-supplement-Supp_Fig_2.pdf [file NIHMS1757265-supplement-Supp_Fig_2.pdf]
